# Supplementary material for: Enzymatic synthesis of vitexin glycosides and their activity
Source: Royal Society of Chemistry journal article supplement (doi:10.1039/d2ra04408k), 2022-01-01
Supplement: d2ra04408k1.pdf [file d2ra04408k1.pdf]

# Supporting Information

## Enzymatic synthesis of vitexin glycosides and its activity

Tingting Xu <sup>1</sup>, Ziyun Fan <sup>2</sup>, Junqiao Lou <sup>2</sup>, Qi Du <sup>2</sup>, Yue Kong <sup>2</sup>, Yujia Lu <sup>2</sup>, and Xueming Wu <sup>2,\*</sup>

---

<sup>1</sup>School of medicine & holistic integrative medicine, Nanjing University of Chinese Medicine, Nanjing, 210023, China.

<sup>2</sup>State Key Laboratory Cultivation Base for TCM Quality and Efficacy, School of pharmacy, Nanjing University of Chinese Medicine, Nanjing, 210023, China. E-mail: xuemingwu@njucm.edu.cn

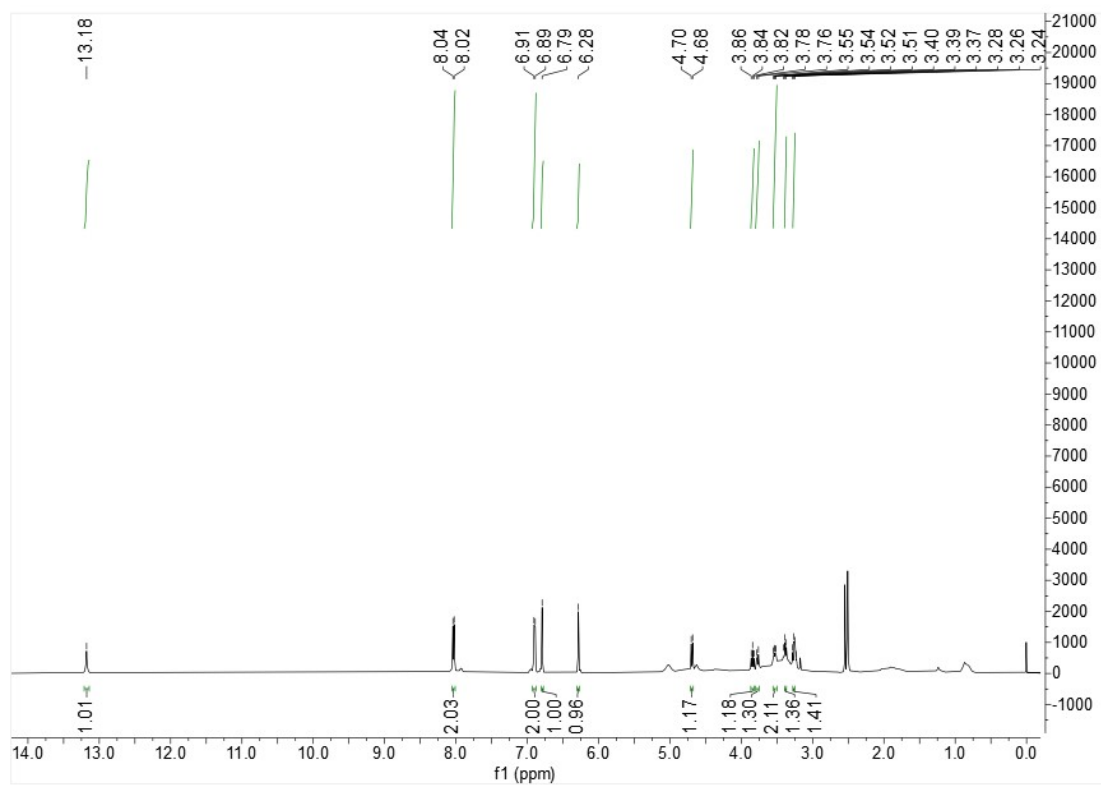

Figure S1. The <sup>1</sup>H NMR spectrum of vitexin in DMSO-d<sub>6</sub> (600 MHz).

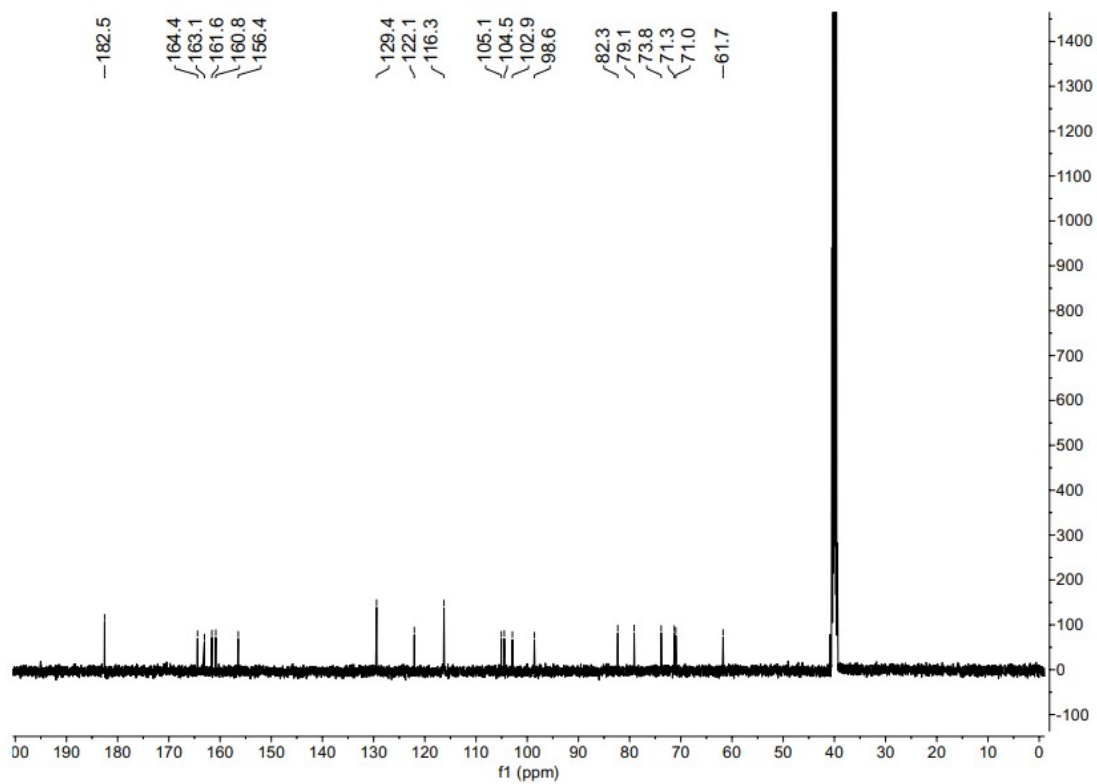

Figure S2. The  $^{13}\text{C}$  NMR spectrum of vitexin in  $\text{DMSO-}d_6$  (600 MHz).

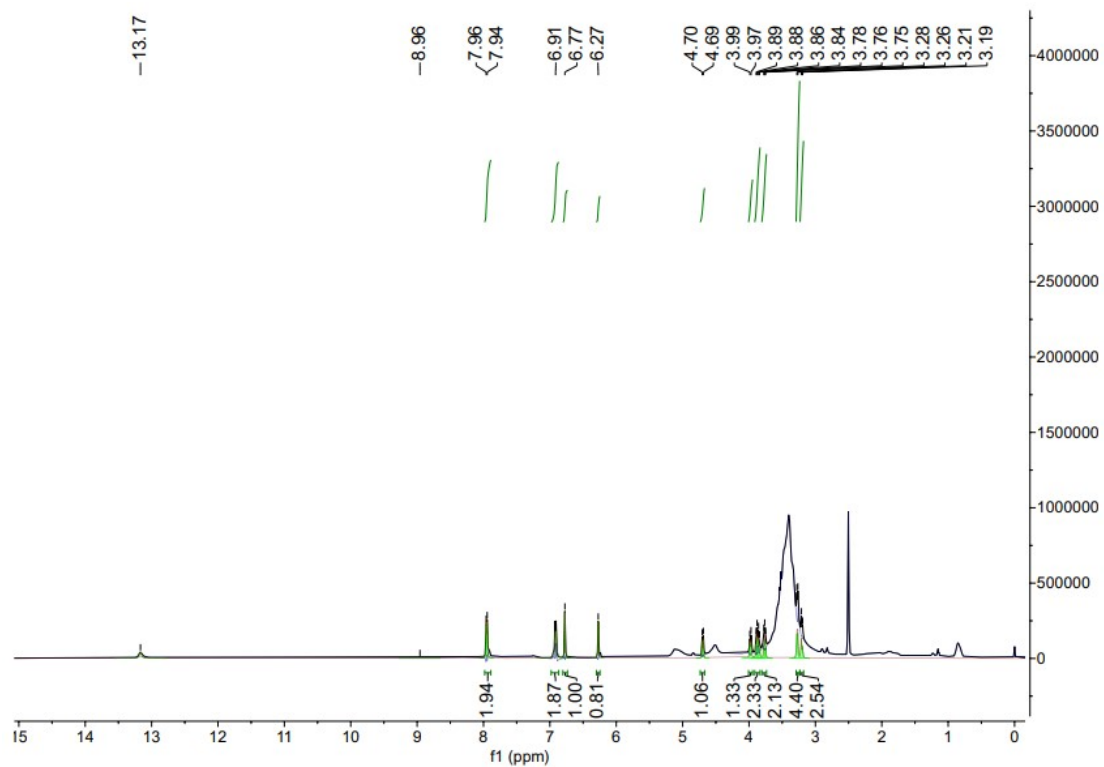

Figure S3. The <sup>1</sup>H NMR spectrum of β-D-fructofuranosyl-(2→6)-vitexin in DMSO-*d*<sub>6</sub> (600 MHz).

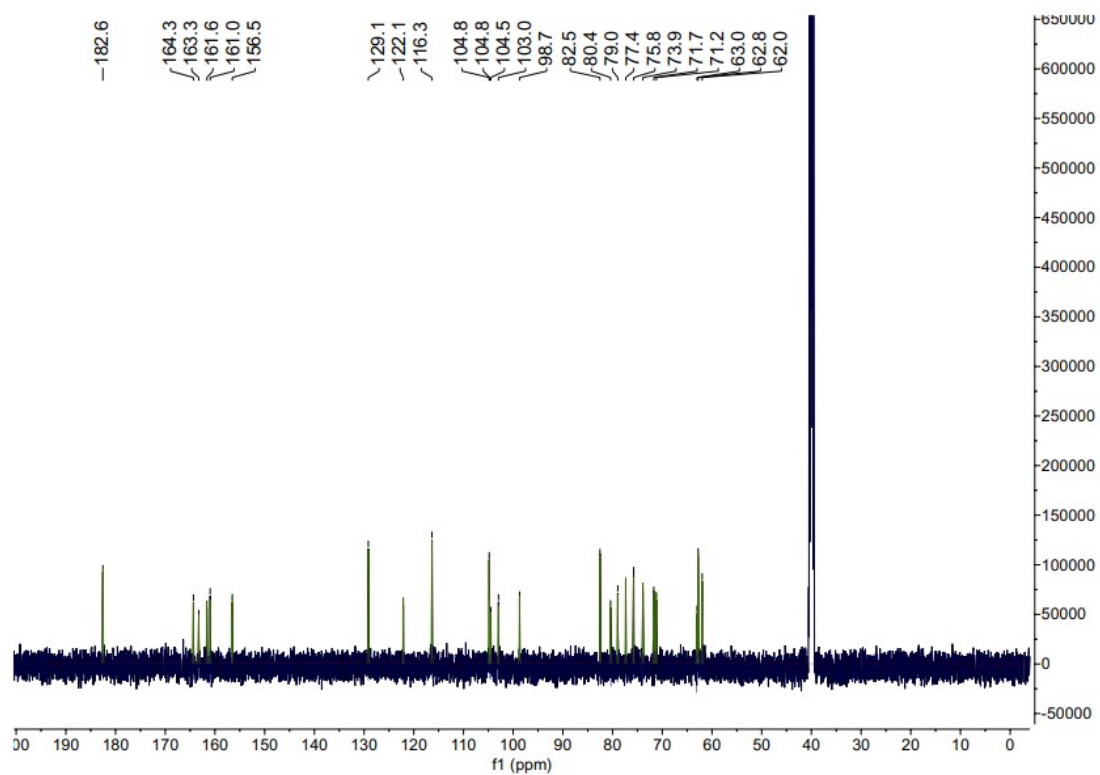

Figure S4. The <sup>13</sup>C NMR spectrum of β-D-fructofuranosyl-(2→6)-vitexin in DMSO-*d*<sub>6</sub> (600 MHz).

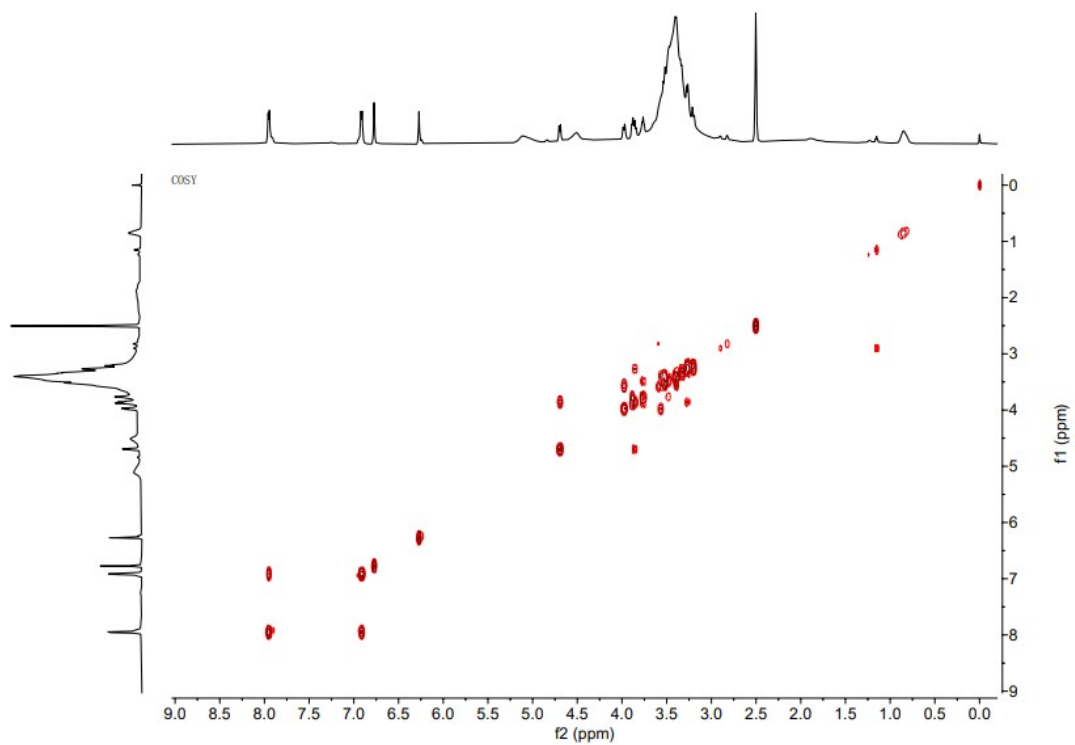

Figure S5. The COSY spectrum of  $\beta$ -D-fructofuranosyl-(2 $\rightarrow$ 6)-vitexin in DMSO- $d_6$  (600 MHz).

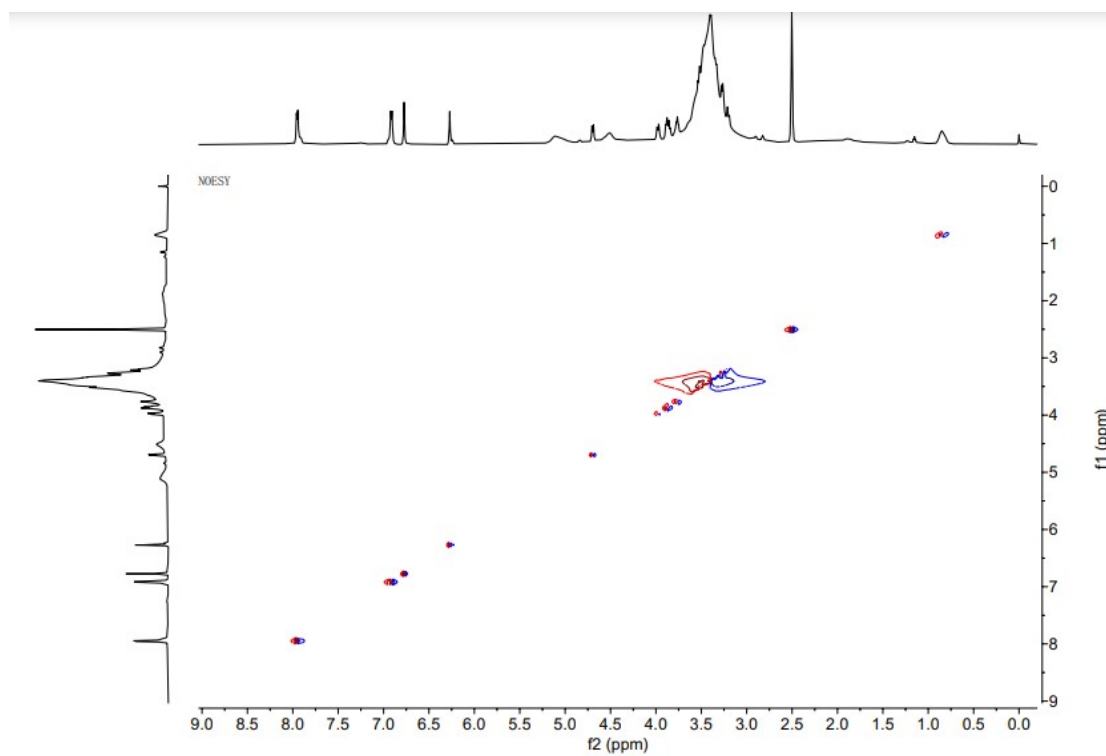

Figure S6. The NOESY spectrum of  $\beta$ -D-fructofuranosyl-(2 $\rightarrow$ 6)-vitexin in DMSO-*d*<sub>6</sub> (600 MHz).

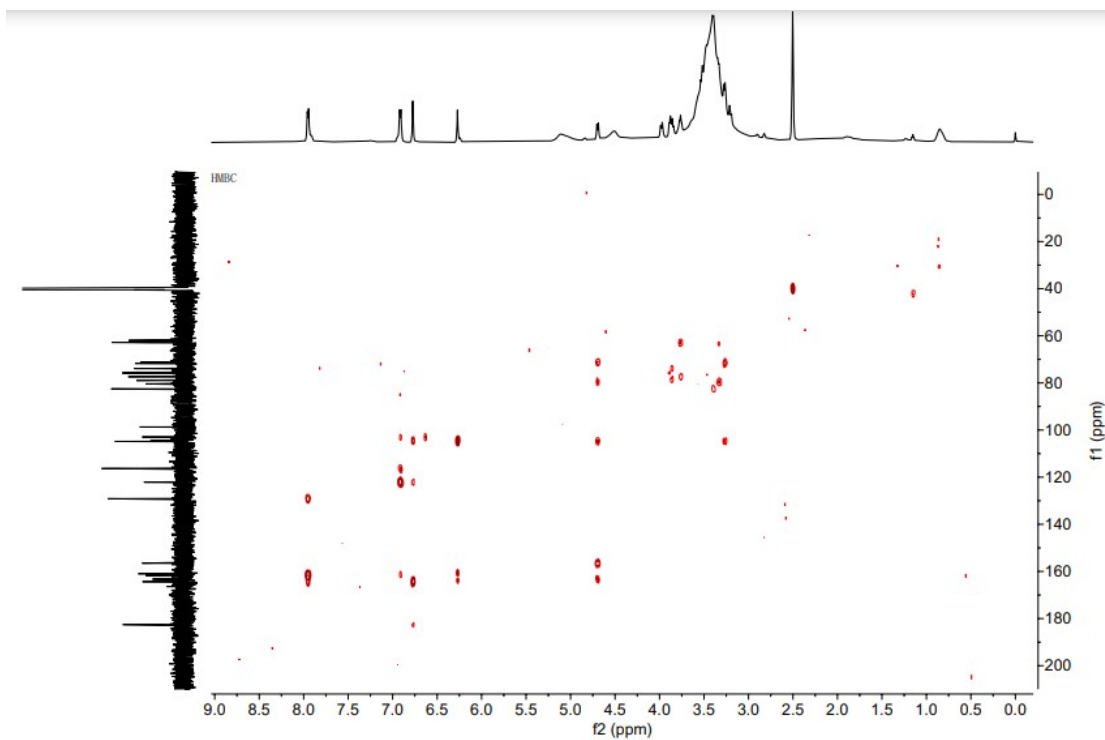

Figure S7. The HMBC spectrum of  $\beta$ -D-fructofuranosyl-(2 $\rightarrow$ 6)-vitexin in DMSO- $d_6$  (600 MHz).



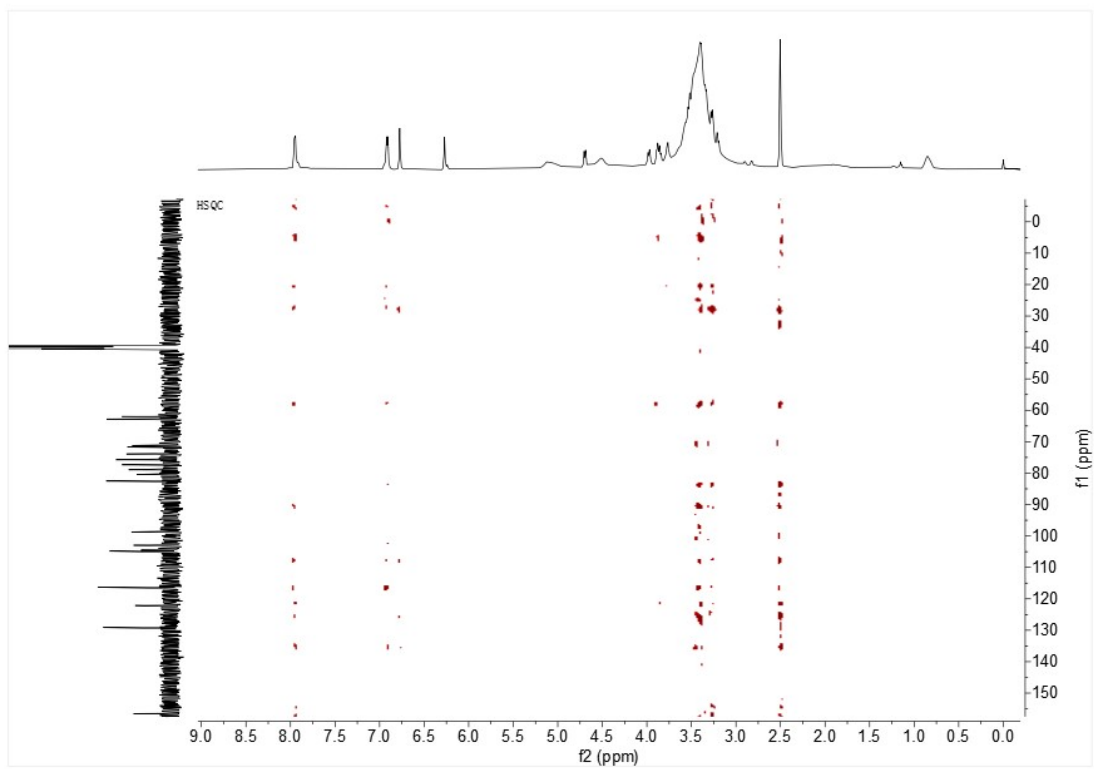

Figure S8. The HSQC spectrum of  $\beta$ -D-fructofuranosyl-(2 $\rightarrow$ 6)-vitexin in DMSO- $d_6$  (600 MHz).

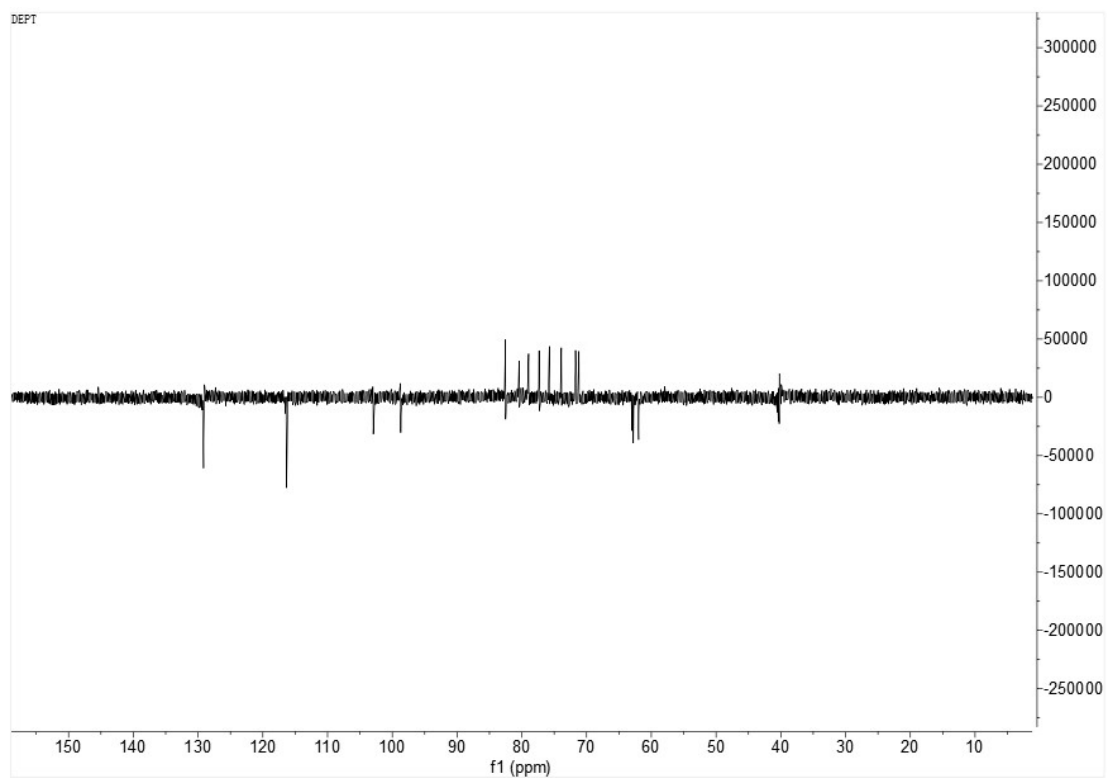

Figure S9. The DEPT spectrum of  $\beta$ -D-fructofuranosyl-(2 $\rightarrow$ 6)-vitexin in DMSO- $d_6$  (600 MHz).

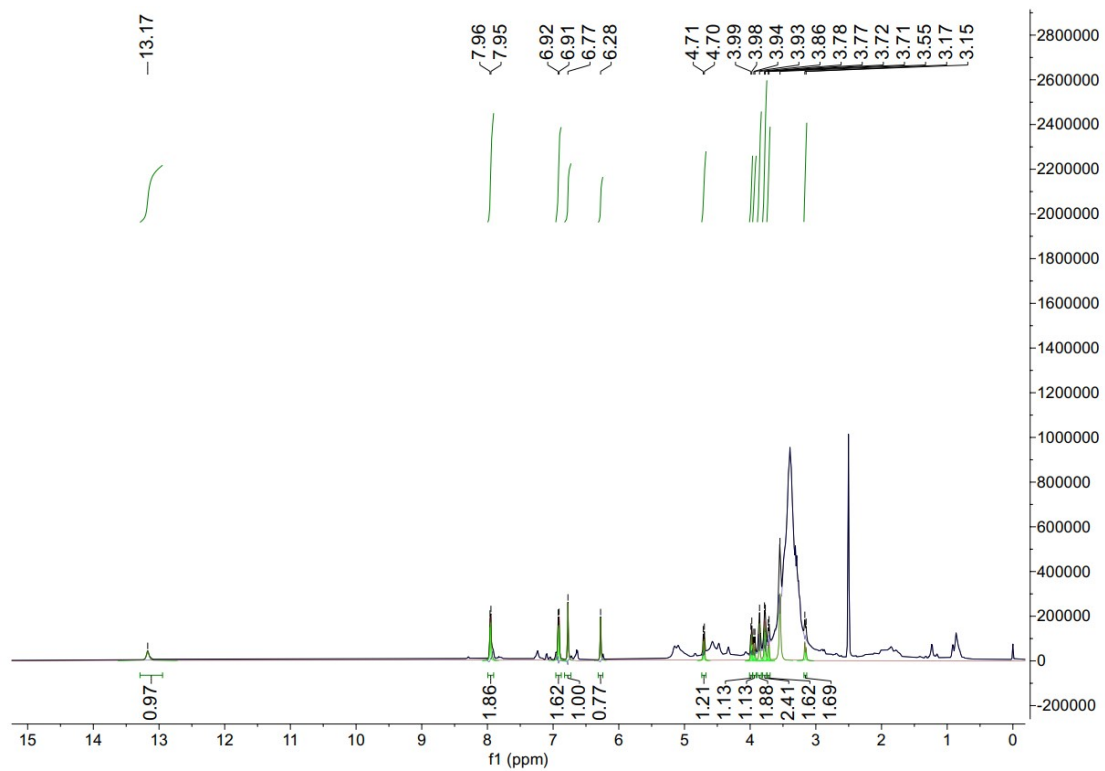

Figure S10. The  $^1\text{H}$  NMR spectrum of  $\beta\text{-D-difructofuranosyl-(2}\rightarrow\text{6)-vitexin}$  in  $\text{DMSO-}d_6$  (600 MHz).

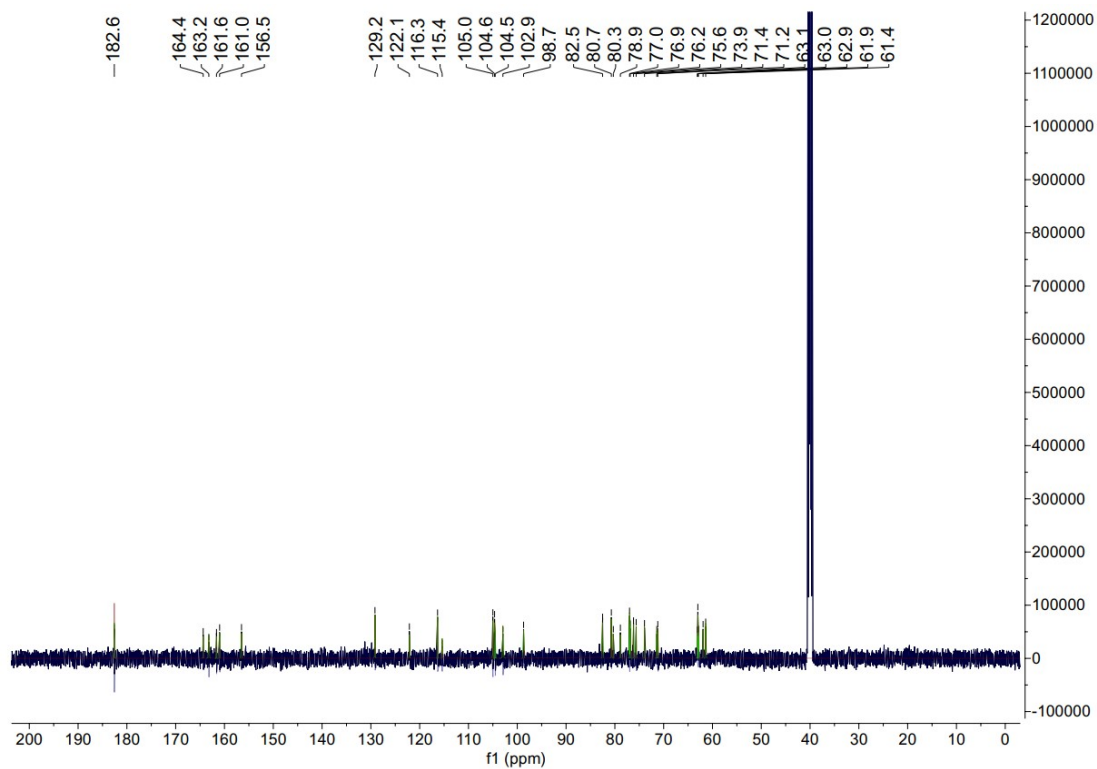

Figure S11. The  $^{13}\text{C}$  NMR spectrum of  $\beta$ -D-difructofuranosyl-(2 $\rightarrow$ 6)-vitexin in  $\text{DMSO-}d_6$  (600 MHz).

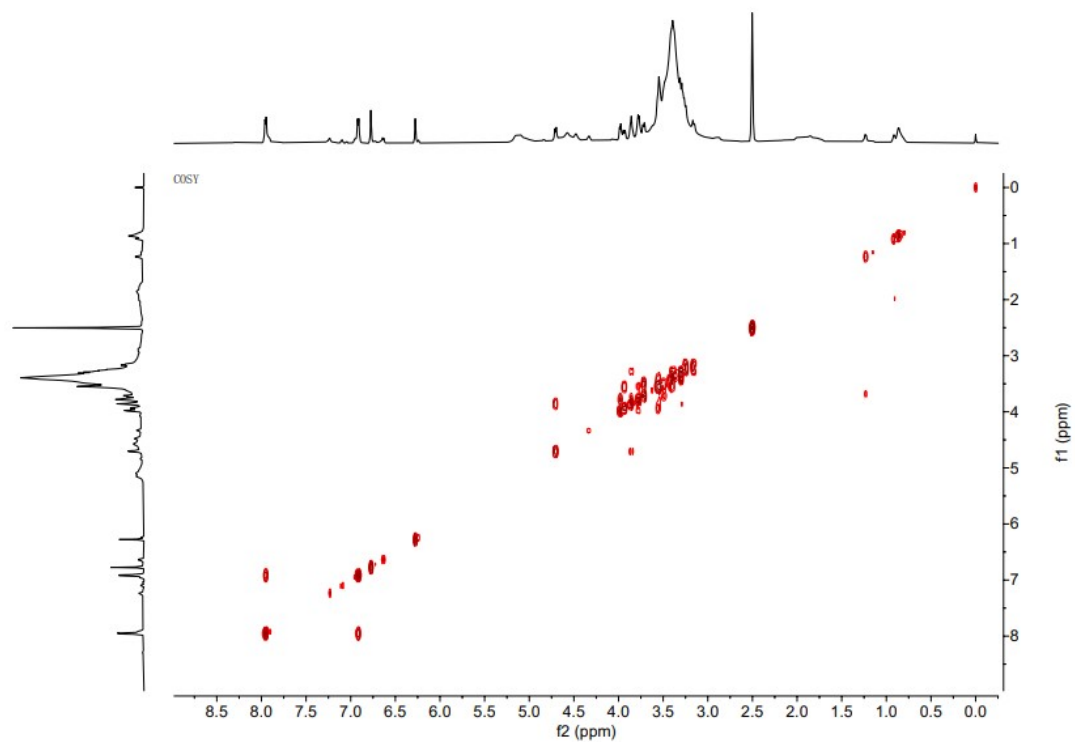

Figure S12. The COSY spectrum of  $\beta$ -D-difructofuranosyl-(2 $\rightarrow$ 6)-vitexin in DMSO- $d_6$  (600 MHz).

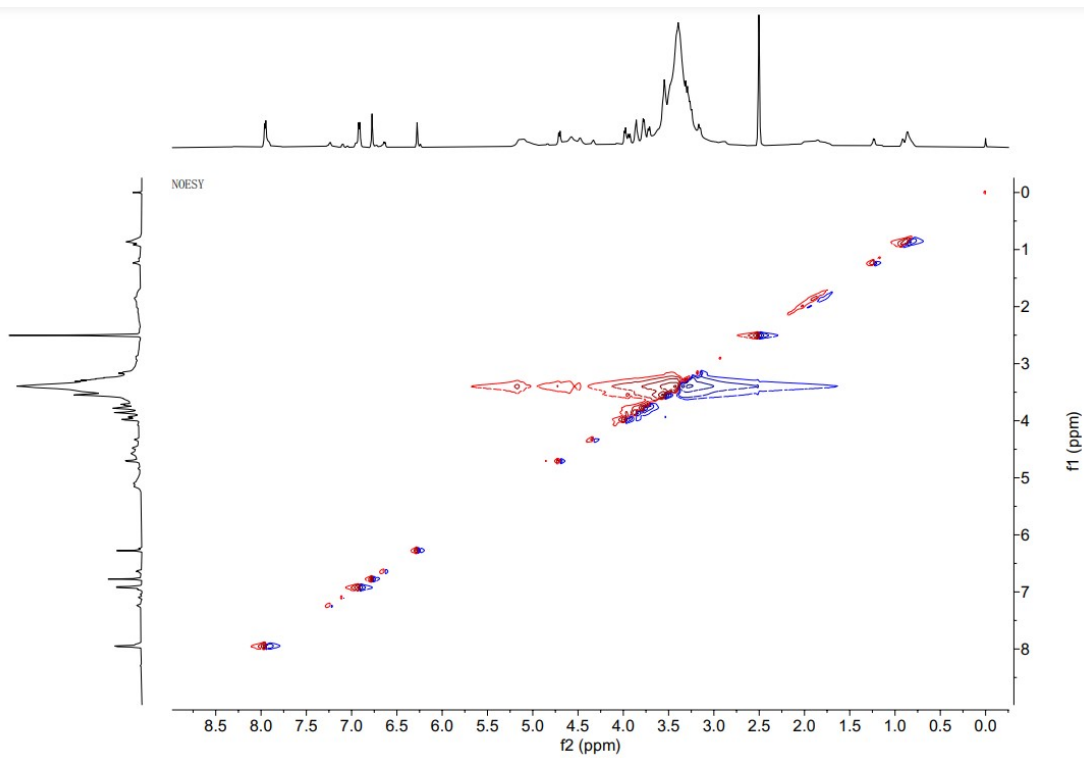

Figure S13. The NOESY spectrum of  $\beta$ -D-difrucctofuranosyl-(2 $\rightarrow$ 6)-vitexin in DMSO- $d_6$  (600 MHz).

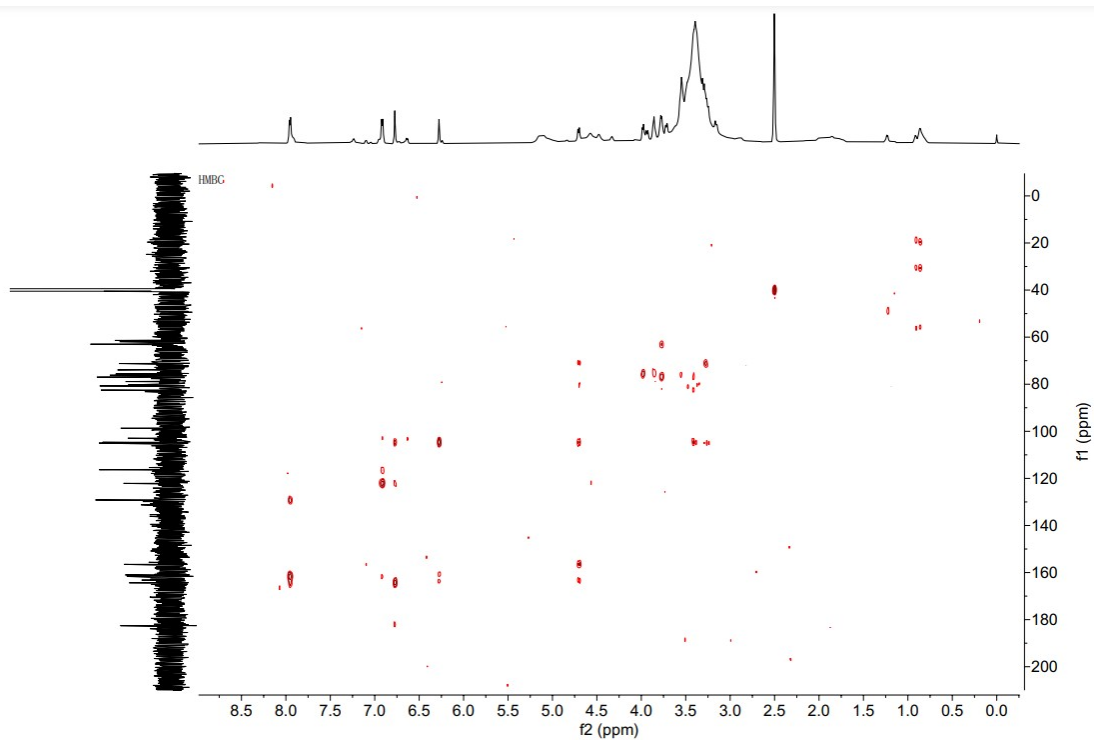

Figure S14. The HMBC spectrum of  $\beta$ -D-difrucctofuranosyl-(2 $\rightarrow$ 6)-vitexin in DMSO- $d_6$  (600 MHz).

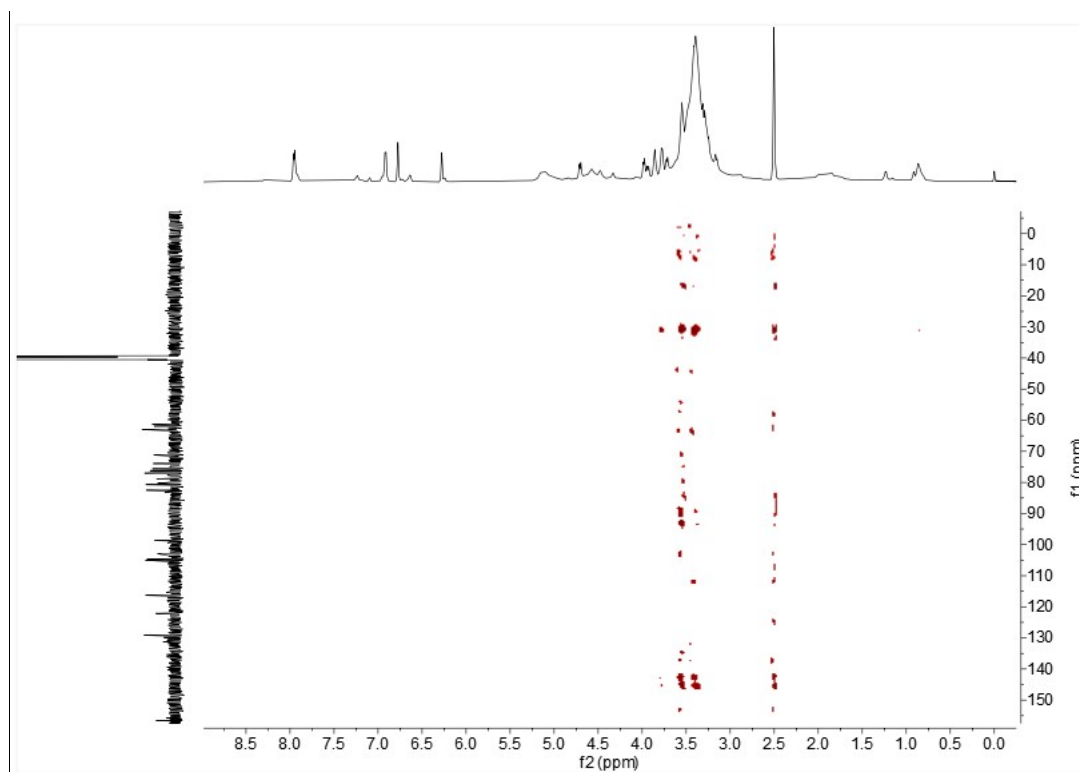

Figure S15. The HSQC spectrum of  $\beta$ -D-difructofuranosyl-(2 $\rightarrow$ 6)-vitexin in DMSO- $d_6$  (600 MHz).



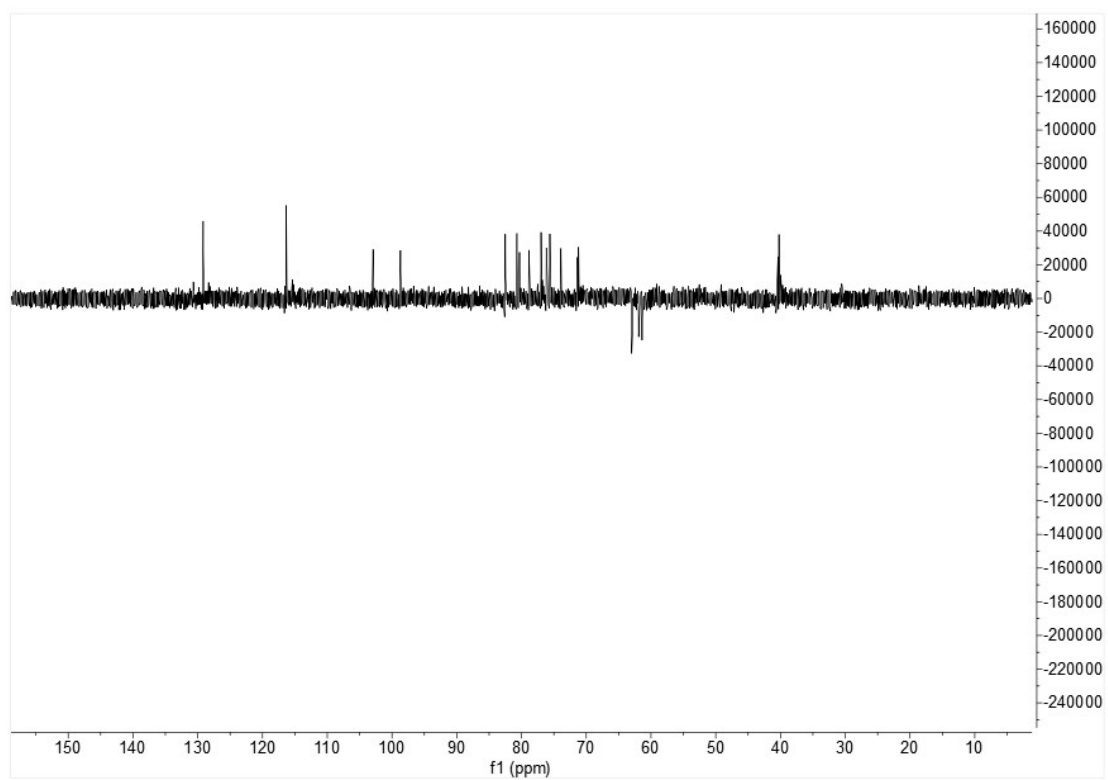

Figure S16. The DEPT spectrum of  $\beta$ -D-diffructofuranosyl-(2 $\rightarrow$ 6)-vitexin in DMSO- $d_6$  (600 MHz).
